# Supplementary material for: Cationic−anionic complexes of Cu(ii) and Co(ii) with N-scorpionate ligand – structure, spectroscopy, and catecholase activity
Source: Royal Society of Chemistry journal article supplement (doi:10.1039/d4dt03478c), 2025-01-01
Supplement: d4dt03478c1.pdf [file d4dt03478c1.pdf]

Electronic Supplementary Information

## Cationic-anionic complexes of Cu(II) and Co(II) with N-scorpionate ligand – structure, spectroscopy, and catecholase activity

Małgorzata Zienkiewicz-Machnik,<sup>\*a</sup> Roman Luboradzki,<sup>a</sup> Justyna Mech-Piskorz,<sup>a</sup> Gonzalo Angulo,<sup>a</sup> Wojciech Nogala,<sup>a</sup> Tomasz Ratajczyk,<sup>a</sup> Pavlo Aleshkevych,<sup>b</sup> Adam Kubas<sup>\*a</sup>

<sup>a</sup>Institute of Physical Chemistry Polish Academy of Sciences, Kasprzaka 44/52, 01-224 Warsaw, Poland

<sup>b</sup>Institute of Physics Polish Academy of Sciences, Al. Lotników 32/46, 02-668 Warsaw, Poland

**Table S1** Bond lengths and angles for **1**.

| Bond lengths (Å)                       |             |            |            |
|----------------------------------------|-------------|------------|------------|
| Cu1-Cl1                                | 2.2604(5)   | Cu2-N3     | 1.9572(16) |
| Cu1-Cl2                                | 2.2338(5)   | Cu2-N5     | 1.9813(16) |
| Cu2-Cl3                                | 2.2258(5)   | Cu2-N7     | 2.3583(16) |
| Cu2-N1                                 | 2.1503(15)  |            |            |
| Bond angles (°)                        |             |            |            |
| Cl2-Cu1-Cl2 <sup>i</sup>               | 99.96(3)    | N3-Cu2-Cl3 | 99.00(5)   |
| Cl2-Cu1-Cl1 <sup>i</sup>               | 101.589(17) | N5-Cu2-Cl3 | 97.06(5)   |
| Cl2-Cu1-Cl1                            | 127.487(17) | N1-Cu2-Cl3 | 163.85(4)  |
| Cl2 <sup>i</sup> -Cu1-Cl1              | 101.588(17) | N3-Cu2-N7  | 91.88(6)   |
| Cl1 <sup>i</sup> -Cu1-Cl1              | 101.99(3)   | N5-Cu2-N7  | 90.42(6)   |
| Cl1 <sup>i</sup> -Cu1-Cl2 <sup>i</sup> | 127.487(17) | N1-Cu2-N7  | 79.40(5)   |
| N3-Cu2-N1                              | 81.29(6)    | Cl3-Cu2-N7 | 116.66(4)  |
| N5-Cu2-N1                              | 80.30(6)    | N3-Cu2-N5  | 160.69(6)  |

Symmetry codes: (i)  $-x, y, 0.5-z$ .

**Table S2** Relevant interatomic contacts for **1**.

| D-H...A                      | d(D-H) (Å) | d(H...A) (Å) | d(D...A) (Å) | <DHA (°) |
|------------------------------|------------|--------------|--------------|----------|
| C18-H18c...Cl3 <sup>i</sup>  | 0.960      | 2.942        | 3.793        | 148.33   |
| C6-H6b...Cl2 <sup>ii</sup>   | 0.960      | 2.707        | 3.634        | 162.43   |
| C1-H1a...Cl1                 | 0.970      | 2.649        | 3.510        | 128.60   |
| C7-H7b...Cl1                 | 0.970      | 2.780        | 3.652        | 149.84   |
| C7-H7b...Cl2 <sup>iii</sup>  | 0.970      | 2.782        | 3.498        | 131.24   |
| C1-H1b...Cl2 <sup>iv</sup>   | 0.970      | 2.706        | 3.637        | 160.99   |
| C5-H5c...Cl2 <sup>iv</sup>   | 0.960      | 2.797        | 3.744        | 169.31   |
| C7-H7a...Cl1 <sup>iv</sup>   | 0.970      | 2.833        | 3.759        | 160.00   |
| C11-H11a...Cl1 <sup>iv</sup> | 0.960      | 2.786        | 3.714        | 162.70   |
| C13-H13b...Cl1 <sup>iv</sup> | 0.970      | 2.852        | 3.797        | 164.99   |
| C17-H17a...Cl2 <sup>v</sup>  | 0.960      | 2.789        | 3.707        | 160.24   |

Symmetry codes: (i)  $-0.5+x, -0.5-y, z$ ; (ii)  $-x, -1+y, 0.5-z$ ; (iii)  $-x, y, 0.5-z$ ; (iv)  $-0.5+x, 0.5-y, z$ ; (v)  $-0.5-x, 0.5-y, 0.5-z$ .

**Table S3** Bond lengths and angles for **2**.

| Bond lengths (Å) |           |             |           |
|------------------|-----------|-------------|-----------|
| Co1-Cl1          | 2.2580(5) | Co2-Cl2     | 2.2409(5) |
| Co1-N1           | 2.067(1)  | Co2-Cl3     | 2.2532(4) |
| Co1-N3           | 2.305(1)  | Co2-Cl4     | 2.2971(4) |
| Co1-N5           | 2.068(1)  | Co2-N8      | 2.033(1)  |
| Co1-N7           | 2.089(1)  |             |           |
| Bond angles (°)  |           |             |           |
| N1-Co1-Cl1       | 105.11(4) | N7-Co1-N3   | 76.08(5)  |
| N3-Co1-Cl1       | 177.72(3) | N7-Co1-N5   | 117.16(5) |
| N3-Co1-N1        | 76.32(5)  | Cl3-Co2-Cl2 | 111.89(2) |
| N5-Co1-Cl1       | 104.76(4) | Cl4-Co2-Cl2 | 104.22(2) |
| N5-Co1-N1        | 112.42(5) | Cl4-Co2-Cl3 | 108.68(2) |
| N5-Co1-N3        | 76.14(5)  | N8-Co2-Cl2  | 111.20(4) |
| N7-Co1-Cl1       | 101.67(4) | N8-Co2-Cl3  | 111.98(4) |
| N7-Co1-N1        | 113.83(5) | N8-Co2-Cl4  | 108.49(4) |

**Table S4** Relevant interatomic contacts and  $\pi\cdots\pi$  interactions for **2**.

| D-H $\cdots$ A                      | d(D-H) (Å)            | d(H $\cdots$ A) (Å) | d(D $\cdots$ A) (Å) | <DHA (°) |
|-------------------------------------|-----------------------|---------------------|---------------------|----------|
| C4-H4a $\cdots$ Cl1                 | 0.98(1)               | 2.679               | 3.490               | 140.30   |
| C10-H10b $\cdots$ Cl1               | 0.98(1)               | 2.602               | 3.411               | 139.98   |
| C16-H16b $\cdots$ Cl1               | 0.980(5)              | 2.757               | 3.421               | 125.56   |
| C10-H10a $\cdots$ Cl4 <sup>i</sup>  | 0.980(7)              | 2.703               | 3.557               | 145.93   |
| C11-H11a $\cdots$ Cl3 <sup>ii</sup> | 0.979(8)              | 2.876               | 3.832               | 165.55   |
| C12-H12a $\cdots$ Cl3 <sup>ii</sup> | 0.970(2)              | 2.806               | 3.690               | 148.99   |
| C12-H12a $\cdots$ Cl4 <sup>ii</sup> | 0.990(2)              | 2.785               | 3.405               | 121.19   |
| C18-H18a $\cdots$ Cl2 <sup>ii</sup> | 0.990(2)              | 2.924               | 3.593               | 125.70   |
| C18-H18a $\cdots$ Cl4 <sup>ii</sup> | 0.990(2)              | 2.929               | 3.814               | 149.32   |
| N10-H10f $\cdots$ Cl4               | 0.91(2)               | 2.188               | 3.038               | 154.78   |
| C20-H20 $\cdots$ Cl2 <sup>iii</sup> | 0.950(2)              | 2.795               | 3.549               | 136.96   |
| $\pi\cdots\pi$                      | d(Cg $\cdots$ Cg) (Å) | Offset (Å)          |                     |          |
| Cg01-Cg01 <sup>iv</sup>             | 3.561                 | 0.430               |                     |          |
| Cg02-Cg02 <sup>v</sup>              | 3.821                 | 0.977               |                     |          |

Symmetry codes: (i) x, -1+y, 1+z; (ii) 1-x, 1-y, 1-z; (iii) -x, 1-y, 1-z; (iv) 1-x, -y, 1-z; (v) 1-x, -y, 2-z.

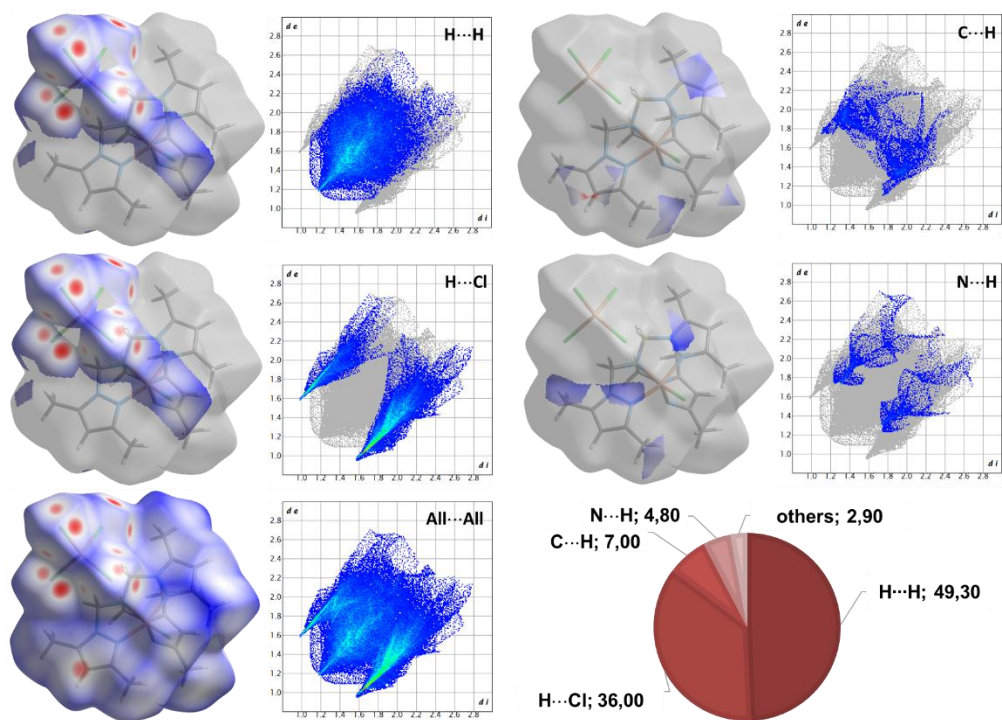

**Fig. S1** 3D Hirshfeld surfaces mapped with  $d_{\text{norm}}$  with corresponding 2D fingerprint plots and the percentage of non-covalent interactions in complex 1.

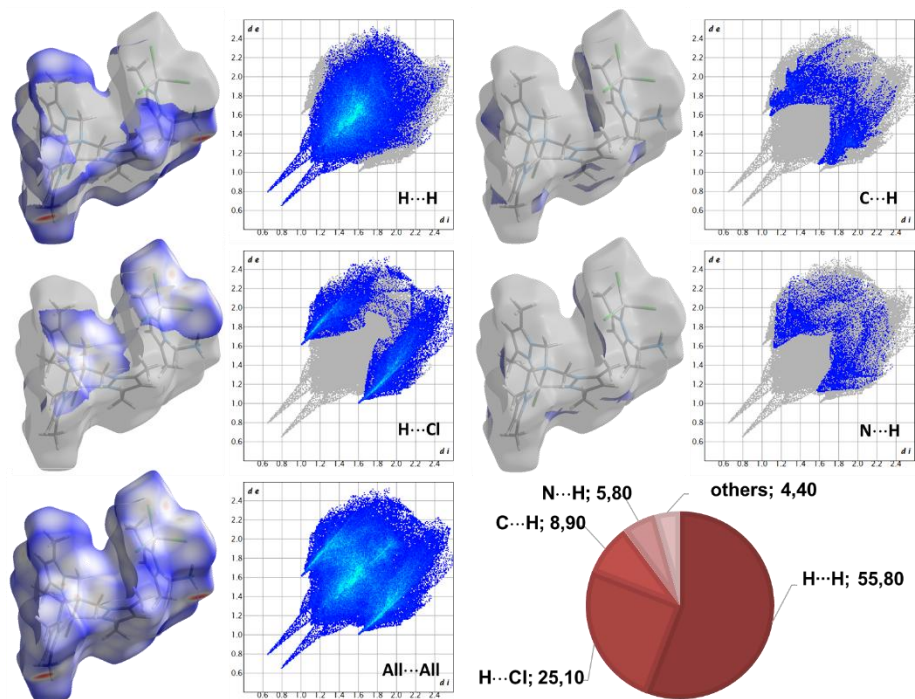

**Fig. S2** 3D Hirshfeld surfaces mapped with  $d_{\text{norm}}$  with corresponding 2D fingerprint plots and the percentage of non-covalent interactions in complex 2.

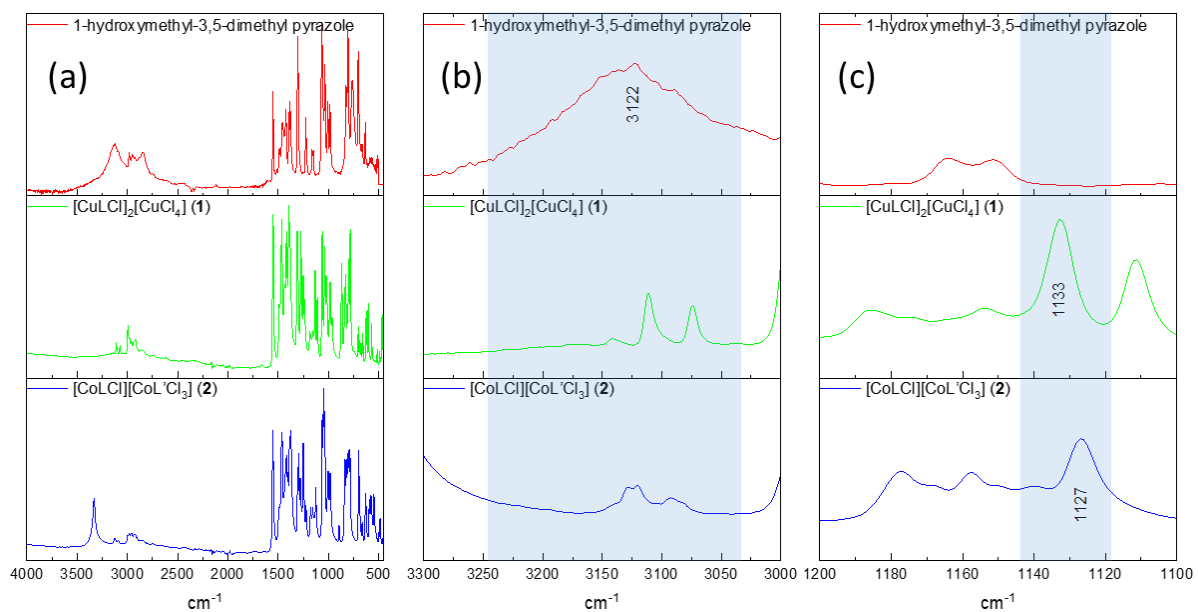

**Fig. S3** The FTIR spectra of the scorpionate ligand's precursor (3,5-DMePzCH<sub>2</sub>OH) and complexes **1** and **2** (a) with the separation of spectral ranges for the OH stretching band (b) and  $\nu(\text{C-N})$  stretching vibrations (c) showing changes in the spectra connected with the formation of poly pyrazole ligand.

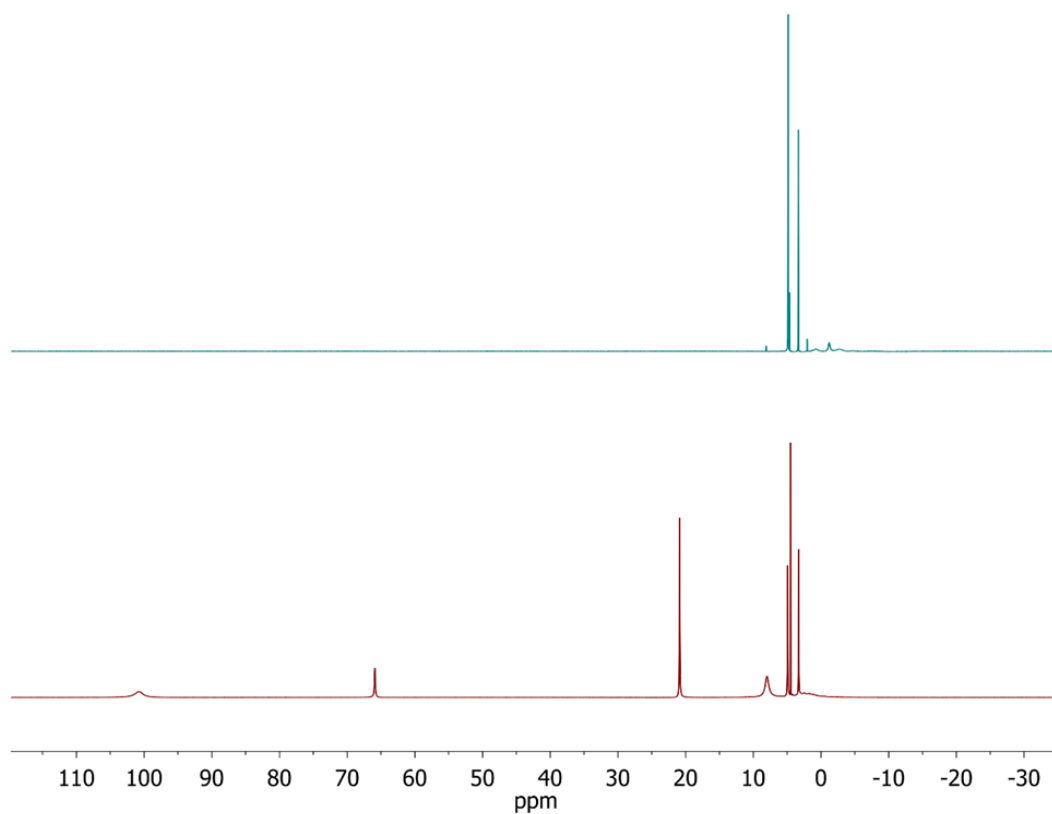

**Fig. S4** The superposition of <sup>1</sup>H NMR spectra of complexes **1** - green and **2** - red ([D<sub>3</sub>]MeOH, 298K).

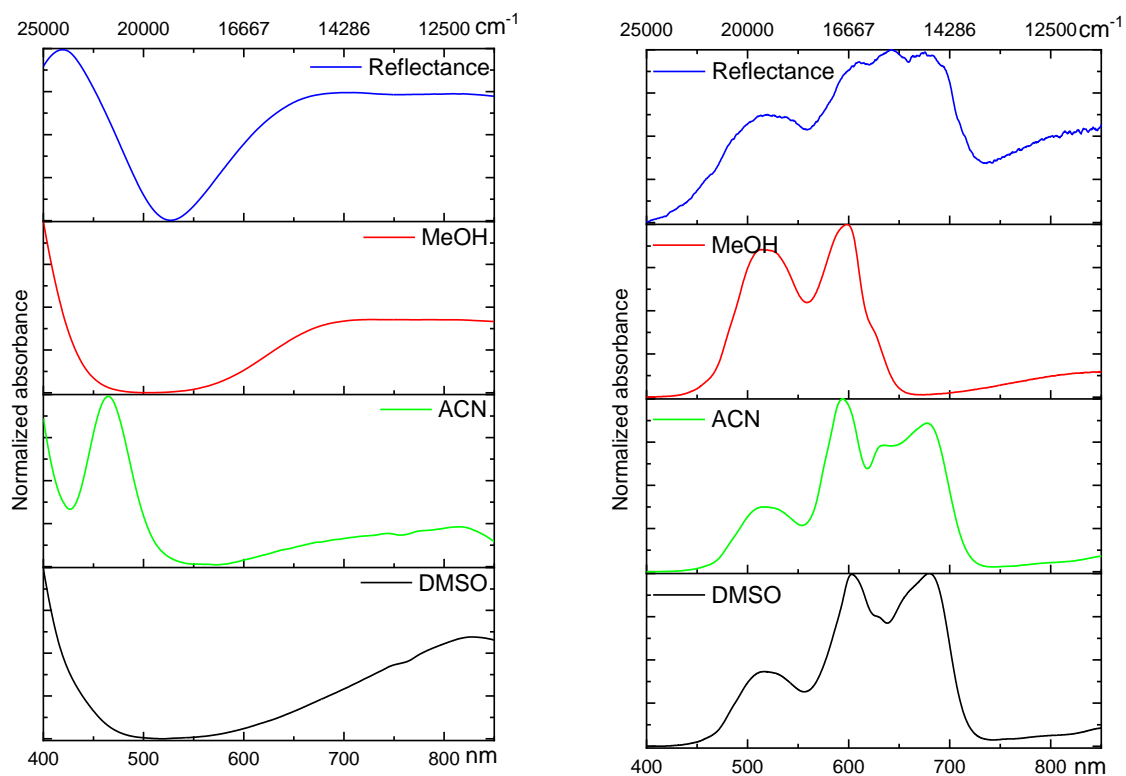

**Fig. S5** Normalized UV-Vis spectra for complexes **1** (on the left) and **2** (on the right).

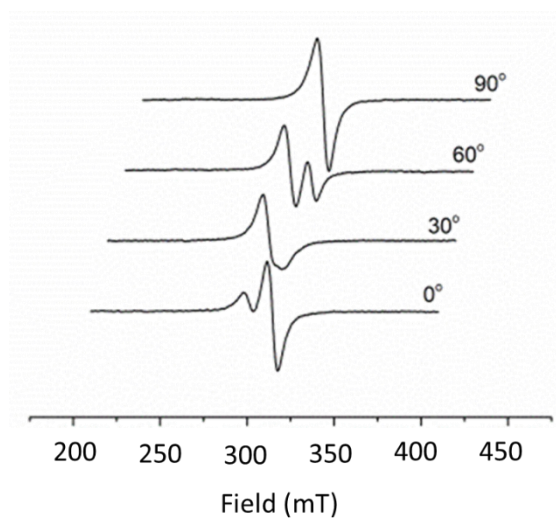

**Fig. S6** The experimental EPR spectra of single crystal of complex **1** recorded at T = 5K at different angles of the external magnetic field with respect to the crystal.

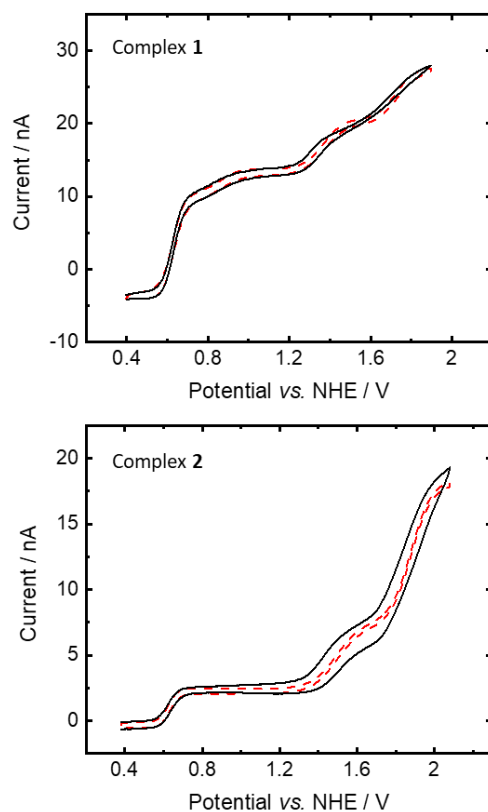

**Fig. S7** Cyclic voltammograms of complexes **1** and **2** (each at a concentration of 1 mM) recorded under ambient air atmosphere in acetonitrile solution containing 0.1 M  $\text{NBu}_4\text{PF}_6$  with the scan rate 25 mV/s. Lines (—) and (---) represent the experimental and simulated curves, respectively.

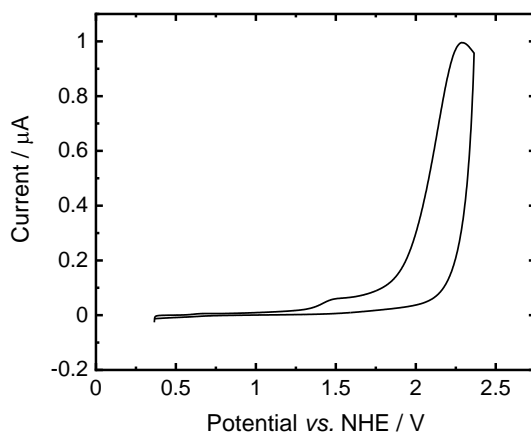

**Fig. S8** Cyclic voltammogram of the scorpionate ligand recorded under ambient air atmosphere in acetonitrile solution containing 0.1 M  $\text{NBu}_4\text{PF}_6$  with the scan rate 1 V/s.

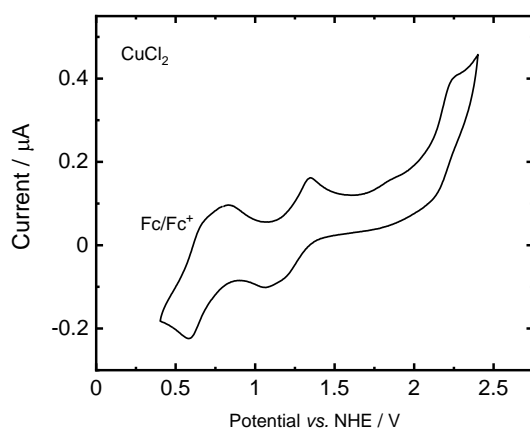

**Fig. S9** Cyclic voltammogram of anhydrous  $\text{CuCl}_2$  recorded under ambient air atmosphere in acetonitrile solution containing 0.1 M  $\text{NBu}_4\text{PF}_6$  with the scan rate 1 V/s.

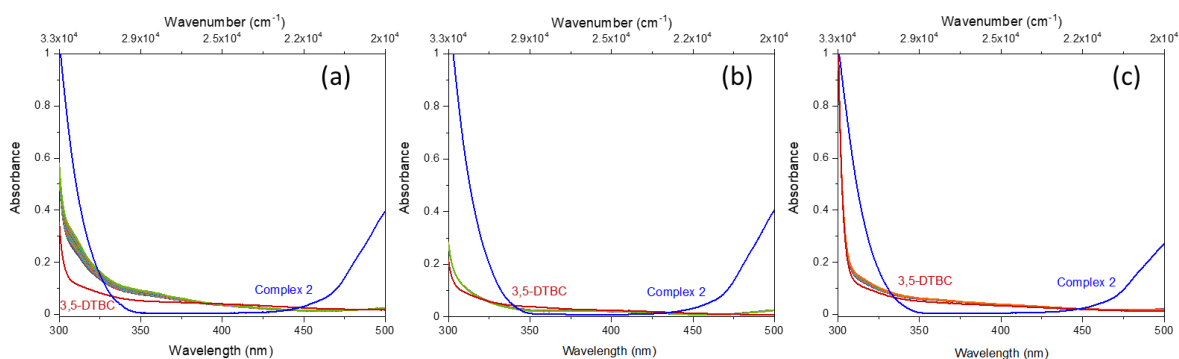

**Fig. S10** Spectral changes observed during the oxidation of 3,5-DTBC ( $1 \cdot 10^{-2}$  M) in the presence of **2** ( $5 \cdot 10^{-5}$  M) in different solvents: (a) in MeOH, (b)  $\text{CH}_3\text{CN}$  and (c) DMSO. No changes in the absorbance at 400 nm indicate the lack of activity in the reaction.

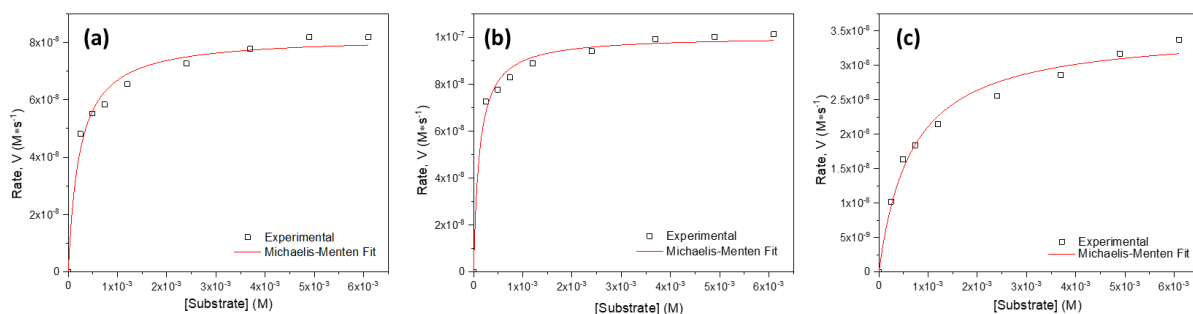

**Fig. S11** Plots of rate vs substrate concentration for the catalytic oxidation of 3,5-DTBC in the presence of  $(\text{NH}_4)_2[\text{CuCl}_4]$  in different solvents: (a) in MeOH, (b) in  $\text{CH}_3\text{CN}$  and (c) in DMSO.

**Table S5** Kinetic parameters for catecholase activity of  $(\text{NH}_4)_2[\text{CuCl}_4]$ .

| Solvent                | $V_{max}$ ( $\text{M}\cdot\text{s}^{-1}$ ) ( $\cdot 10^{-8}$ ) | Std. error ( $\cdot 10^{-9}$ ) | $K_M$ (M) ( $\cdot 10^{-4}$ ) | Std. error ( $\cdot 10^{-5}$ ) | $K_{cat}$ ( $\text{h}^{-1}$ ) |
|------------------------|----------------------------------------------------------------|--------------------------------|-------------------------------|--------------------------------|-------------------------------|
| MeOH                   | 8.21                                                           | 2.22                           | 2.27                          | 3.51                           | 2.95                          |
| $\text{CH}_3\text{CN}$ | 9.98                                                           | 1.80                           | 1.19                          | 1.72                           | 3.62                          |
| DMSO                   | 3.52                                                           | 1.26                           | 6.66                          | 8.88                           | 1.27                          |

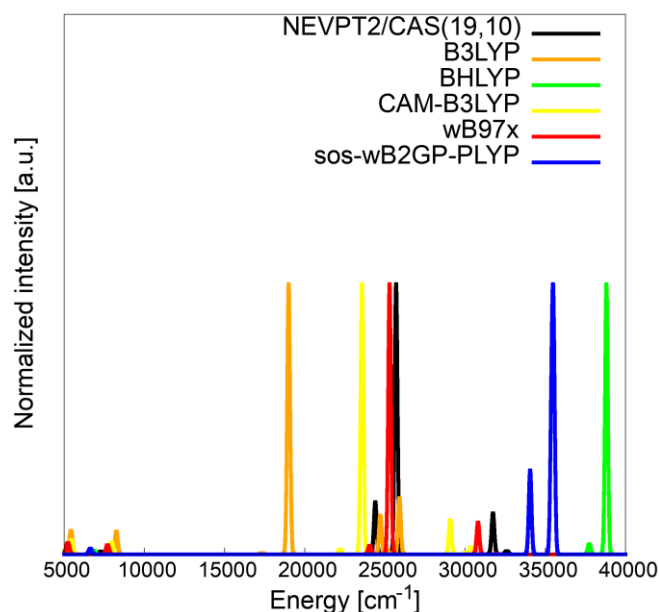

**Fig. S12** Comparison of computed reference spectrum of  $[\text{CuCl}_4]^{2-}$  (black) with those obtained from TD-DFT calculations with various functionals. Reference calculations were performed at a multireference level using CASSCF(19,10) wavefunction augmented with NEVPT2 dynamic correlation treatment. The averaging was performed over 10 states, and active space covered five 3d orbitals of Cu and five ligand-based orbitals. We show that  $\omega\text{B97x}$  (red) provides a spectra profile close to reference NEVPT2 (black).

### XYZ coordinates of key structures discussed in the main manuscript (fully optimized structures if not stated otherwise)

1 anion

|    |                   |                  |                  |
|----|-------------------|------------------|------------------|
| Cu | -1.40647302439797 | 3.52729091136835 | 7.19744103222713 |
| Cl | -0.87108521216340 | 2.05037563857723 | 5.52672483178254 |
| Cl | -0.15363793951266 | 5.01703694863571 | 8.40559338651244 |
| Cl | -1.94186079511489 | 2.05037558768867 | 8.86815716498594 |
| Cl | -2.65930802881106 | 5.01703691373004 | 5.98928858449193 |

1 cation

|   |                   |                   |                  |
|---|-------------------|-------------------|------------------|
| C | -3.67467230354865 | 0.68651246631254  | 6.26694247264088 |
| H | -2.72631628526721 | 1.25129534385057  | 6.28046328800222 |
| H | -4.27568191636484 | 0.96257746663236  | 7.15096138581995 |
| C | -3.57737058623010 | -1.63515925542426 | 7.33929044522721 |
| C | -3.17383589624704 | -2.87380526110569 | 6.82555294798749 |
| H | -3.16418870203667 | -3.82416482648236 | 7.36308896679686 |
| C | -2.79440101822991 | -2.65388397883010 | 5.47664947928489 |
| C | -4.06766900100223 | -1.25171520511895 | 8.69559642294511 |
| H | -3.34948545467871 | -0.59217422695205 | 9.21707656645195 |
| H | -4.20662343920763 | -2.15848100006194 | 9.30554151308016 |
| H | -5.03486362297011 | -0.71867772235288 | 8.64232687576770 |



|    |                   |                   |                   |
|----|-------------------|-------------------|-------------------|
| C  | -2.39201811008604 | -3.65293393492073 | 4.44237063523761  |
| H  | -3.28474120278705 | -4.01641313433728 | 3.89770231229284  |
| H  | -1.90593388038482 | -4.52430047581408 | 4.91178600490361  |
| H  | -1.71528614394726 | -3.19412496873708 | 3.70223067222263  |
| C  | -4.12594278725519 | 2.32744598545300  | 4.47054975174932  |
| H  | -4.85430797008843 | 3.06027136766882  | 4.86017322919893  |
| H  | -3.10345683172763 | 2.64073104162451  | 4.74714133622550  |
| C  | -4.86627146289811 | 3.14359558459798  | 2.16433012069264  |
| C  | -4.65203679591264 | 2.61857513127330  | 0.88510368404346  |
| H  | -4.99549185510331 | 3.04957592499338  | -0.05734728731339 |
| C  | -3.90932835727787 | 1.42139550244751  | 1.05154469766123  |
| C  | -5.55964398107317 | 4.38949830079508  | 2.60581107579516  |
| H  | -6.27286964993819 | 4.19151628799464  | 3.42619571070448  |
| H  | -6.11645001702892 | 4.82013845673531  | 1.75840999499073  |
| H  | -4.83916134068464 | 5.14813862265877  | 2.96482390511734  |
| C  | -3.47740801039712 | 0.44950059973847  | 0.00446780473540  |
| H  | -2.67576039758034 | -0.20231487793627 | 0.38918517896294  |
| H  | -3.11910452765146 | 0.98545804609058  | -0.89162140277225 |
| H  | -4.32937432011067 | -0.18266326970130 | -0.30703150178234 |
| C  | -5.75383103678134 | 0.50314246443662  | 4.92127399994446  |
| H  | -5.90271268198323 | -0.24098142554102 | 5.72141062444881  |
| H  | -6.46306006633603 | 1.33636571303550  | 5.05892622158319  |
| C  | -6.98592041939239 | 0.15843757213890  | 2.70411908949145  |
| C  | -6.76131827653202 | -0.73923992995332 | 1.64968742292763  |
| H  | -7.34288855140485 | -0.80989251313432 | 0.72799862458510  |
| C  | -5.62839270595448 | -1.51006235326923 | 2.01962446473723  |
| C  | -8.01316108693563 | 1.22653906060902  | 2.87798086434709  |
| H  | -8.71076987408735 | 0.99481343021940  | 3.70418017648808  |
| H  | -8.60087196171802 | 1.32759645195413  | 1.95162592769374  |
| H  | -7.54570287489533 | 2.20356334066700  | 3.09675371315723  |
| C  | -4.91356943873381 | -2.59408560370299 | 1.27513140882687  |
| H  | -3.82197013274066 | -2.49536813407216 | 1.41669318869913  |
| H  | -5.14013369000777 | -2.54986805223729 | 0.19729407268756  |
| H  | -5.21219399527326 | -3.59453475571736 | 1.64172531312368  |
| N  | -4.35084578409340 | 0.97385682853051  | 4.99176488552484  |
| N  | -3.42008749267530 | -0.73989132024852 | 6.31696525576878  |
| N  | -2.92663143956541 | -1.34097814002603 | 5.19381373683426  |
| N  | -4.26396105161677 | 2.27172745098619  | 3.02818369074886  |
| N  | -3.66626048259847 | 1.23468595651568  | 2.36742198761021  |
| N  | -6.02109615696961 | -0.12012953743350 | 3.63611429942267  |
| N  | -5.1902554452834  | -1.12061897550277 | 3.23566467589673  |
| Cu | -3.19510158309827 | -0.29484875277257 | 3.54688611696463  |
| Cl | -1.36076590336199 | -1.00770576657379 | 2.41008995181730  |

1 dimer (cut from crystal structure; position of H atoms were optimized)

|    |                   |                   |                   |
|----|-------------------|-------------------|-------------------|
| Cu | -1.69250642245164 | 3.96654454324681  | 7.16453706151711  |
| Cl | -0.77261570796267 | 2.45151591230311  | 5.64203582630027  |
| Cl | -0.72135107941821 | 5.54876199618799  | 8.46010408686284  |
| Cl | -2.40551582041467 | 2.52202244834147  | 8.80847380962730  |
| Cl | -2.81255006631998 | 5.33633206895527  | 5.69485412751388  |
| C  | -3.71819711945927 | 0.59812738331898  | 6.16317805609733  |
| H  | -2.74761011628909 | 1.13576224451537  | 6.15985624610351  |
| H  | -4.27788238861846 | 0.90907307971303  | 7.06331123820937  |
| C  | -3.49465312216192 | -1.66782892706062 | 7.32077539756167  |
| C  | -3.11910808291165 | -2.92940726430896 | 6.84024045975086  |
| H  | -3.01082959293507 | -3.84198834758047 | 7.43065573246666  |
| C  | -2.91363139270102 | -2.78936021700816 | 5.44389482119817  |
| C  | -3.82219832521072 | -1.19875206579680 | 8.70235739395785  |
| H  | -3.23616765988225 | -0.30029107928656 | 8.97525748336191  |
| H  | -3.60310472782065 | -1.99988485852497 | 9.42679776816145  |
| H  | -4.89331846826551 | -0.93636896165417 | 8.79771149824853  |
| C  | -2.57069701719135 | -3.84420518456450 | 4.43910377899294  |
| H  | -3.48634091296380 | -4.24891187444049 | 3.96612768353222  |
| H  | -2.04501702897117 | -4.68378092271047 | 4.92447506414569  |
| H  | -1.93786115296644 | -3.42228469955639 | 3.63885478760971  |
| C  | -4.15016947126913 | 2.26713132560214  | 4.41666223090375  |
| H  | -4.92877794511257 | 2.98534115961636  | 4.72886469465760  |
| H  | -3.17520640722225 | 2.60805230857626  | 4.81966040870680  |
| C  | -4.41648899991305 | 3.28040573761571  | 2.09805137549917  |
| C  | -3.99548308483493 | 2.85645374416666  | 0.83192933101754  |
| H  | -4.09260719026875 | 3.41112647062225  | -0.10407411141505 |

|    |                   |                   |                   |
|----|-------------------|-------------------|-------------------|
| C  | -3.42580481323822 | 1.56930895534077  | 1.00263575451982  |
| C  | -5.04366960338649 | 4.56100251988243  | 2.54768055639490  |
| H  | -6.04653917582790 | 4.39195375845285  | 2.98346241901839  |
| H  | -5.15328196407321 | 5.24192973051473  | 1.68818992338795  |
| H  | -4.42402853932373 | 5.05842534689539  | 3.31932410335236  |
| C  | -2.88993708231775 | 0.65331648214847  | -0.05294567125315 |
| H  | -2.18312353858000 | -0.07198336282623 | 0.38467321755673  |
| H  | -2.38176202683622 | 1.23490046318040  | -0.84187161853574 |
| H  | -3.70958354924890 | 0.08903250838232  | -0.53767374549336 |
| C  | -5.82317732378594 | 0.47502518559075  | 4.87623321176625  |
| H  | -5.96545844980009 | -0.27464825444970 | 5.67492125851492  |
| H  | -6.51105845525453 | 1.32051905387240  | 5.05320717279665  |
| C  | -7.39308485061667 | -0.12637029380374 | 2.95310266404349  |
| C  | -7.25965674163974 | -1.01292602824585 | 1.87674829271039  |
| H  | -8.02859229812960 | -1.25487684582792 | 1.13920382600579  |
| C  | -5.92960945924303 | -1.50965929073944 | 1.93537788674667  |
| C  | -8.56637769412244 | 0.68021110170028  | 3.41150887029154  |
| H  | -8.96188505689576 | 0.32077525328252  | 4.38038491320285  |
| H  | -9.37657400741885 | 0.60645174182059  | 2.66772207407948  |
| H  | -8.30844749190764 | 1.74851233360001  | 3.53258817345826  |
| C  | -5.22887648611922 | -2.47829483370223 | 1.03110654790605  |
| H  | -4.14065564275341 | -2.45160271212690 | 1.21322280757351  |
| H  | -5.41754843501309 | -2.24417968936065 | -0.03153632893661 |
| H  | -5.58114721120284 | -3.51316122088234 | 1.20455751346947  |
| N  | -4.41547654812198 | 0.90801205677897  | 4.90227457303139  |
| N  | -3.50443136378107 | -0.84153639870465 | 6.23086052342194  |
| N  | -3.13047393100380 | -1.50212594479281 | 5.09590369900501  |
| N  | -4.10401474800287 | 2.26287426118441  | 2.95655957042252  |
| N  | -3.47739369204502 | 1.23330996009267  | 2.31261388495072  |
| N  | -6.17654783070052 | -0.12628942681451 | 3.58832855375575  |
| N  | -5.29427617714186 | -0.96808944930620 | 2.99273263690055  |
| Cu | -3.26045614150365 | -0.41887082227303 | 3.43030200511269  |
| Cl | -1.31072336742695 | -1.17447915915272 | 2.49275548023295  |

#### 2 anion

|    |                   |                  |                  |
|----|-------------------|------------------|------------------|
| Co | 4.39761264361949  | 7.69060473184899 | 3.96495262263983 |
| Cl | 5.96874460314143  | 6.52925356791096 | 5.10808008766081 |
| Cl | 4.33187990001814  | 9.83217237951590 | 4.68358887071264 |
| Cl | 4.79271584588502  | 7.72477683606703 | 1.72090746188607 |
| N  | 2.69195455552192  | 6.68807652879863 | 4.22168852974812 |
| N  | 2.53134832745453  | 5.39973666642555 | 3.78948997183116 |
| N  | 3.30806701812902  | 4.81422114510868 | 1.59190193888885 |
| H  | 3.80150398001497  | 4.05765990189486 | 1.10735349548682 |
| H  | 3.70315810553622  | 5.70835747358885 | 1.25540398485946 |
| C  | 1.51240252348095  | 7.05128309170430 | 4.78252965092690 |
| C  | 0.59038578481606  | 5.97853835699955 | 4.68194892838958 |
| H  | -0.44144453225171 | 5.96188272930848 | 5.04000771725712 |
| C  | 1.26846425965714  | 4.93951211378956 | 4.03495778968356 |
| C  | 1.30892918069841  | 8.38602338099620 | 5.42586913084789 |
| H  | 1.69308901934219  | 8.38971846908773 | 6.46443240883589 |
| H  | 1.85970896551556  | 9.17695621434121 | 4.88825649034745 |
| H  | 0.23404437258206  | 8.63202854733130 | 5.46370736952807 |
| C  | 0.82386422998443  | 3.57493303775974 | 3.62199091894680 |
| H  | 0.96243841418855  | 3.42998160810082 | 2.53461733901837 |
| H  | 1.40227251160310  | 2.78399588167782 | 4.13618314611180 |
| H  | -0.24168250241999 | 3.43520714354839 | 3.86570356804115 |
| C  | 3.57873881304560  | 4.72680640939375 | 3.01514009378546 |
| H  | 4.52811231676718  | 5.19340780961873 | 3.35048863654010 |
| H  | 3.58803766366968  | 3.66961197518285 | 3.33050184802603 |

#### 2 cation

|    |                  |                  |                   |
|----|------------------|------------------|-------------------|
| Co | 4.94148771141369 | 2.19857556132603 | 9.65088613658370  |
| Cl | 3.09130035858919 | 0.93719448414490 | 10.01940956622740 |
| N  | 5.12880661437107 | 2.23482560377238 | 7.64863228632031  |
| N  | 6.31026402551761 | 2.67953053330375 | 7.12417292371185  |
| N  | 6.87644040796317 | 3.51143517219177 | 9.25265856579924  |
| N  | 5.32955569401226 | 5.04175811895451 | 10.14925314676732 |
| N  | 4.51767300579082 | 3.98809259415615 | 10.46508927844664 |
| N  | 7.60934041489657 | 1.87403950058232 | 10.77577229505167 |
| N  | 6.42103941301344 | 1.22166018721246 | 10.59977510694849 |
| C  | 4.29823461919157 | 2.03839300463206 | 6.59467635477835  |

|   |                   |                   |                   |
|---|-------------------|-------------------|-------------------|
| C | 4.98305322367789  | 2.34998408235530  | 5.39476054800248  |
| H | 4.58523165286035  | 2.29412993663868  | 4.37947141615352  |
| C | 6.27077140106135  | 2.76087177481253  | 5.76158234510533  |
| C | 2.87916034214396  | 1.59630906509733  | 6.74873381725456  |
| H | 2.81053709783541  | 0.67021337170833  | 7.34419162581571  |
| H | 2.28132990329634  | 2.35602661512271  | 7.28459901195177  |
| H | 2.42944162926401  | 1.43228149576822  | 5.75586816672149  |
| C | 7.43172208072712  | 3.20243409203159  | 4.93339506963741  |
| H | 7.80396451526961  | 4.19374243813665  | 5.25197269965475  |
| H | 8.27511651401622  | 2.49049136650775  | 5.00218429736335  |
| H | 7.12611192547607  | 3.27139643487305  | 3.87720664378379  |
| C | 7.41992144304702  | 2.93744575713802  | 8.02674811009966  |
| H | 7.93054409093788  | 1.99352772319476  | 8.28995261286449  |
| H | 8.13888166073198  | 3.59968144748016  | 7.51002546796411  |
| C | 6.62196516983964  | -0.05011269544811 | 11.02535642481096 |
| C | 7.95343821190587  | -0.18373630925686 | 11.48932621404345 |
| H | 8.42036883231983  | -1.08479533929005 | 11.89210456684558 |
| C | 8.56643626202601  | 1.06368583473009  | 11.31570402375702 |
| C | 5.56704130284776  | -1.10604236905933 | 10.95368776837428 |
| H | 4.64106407189447  | -0.78136262339234 | 11.45797171433917 |
| H | 5.29053236028744  | -1.32219483232147 | 9.90572161076298  |
| H | 5.93505430123652  | -2.03482203570445 | 11.41930047514857 |
| C | 9.95296601020131  | 1.52560789444730  | 11.61995590379231 |
| H | 10.44917586383058 | 1.93846875528477  | 10.72198038325057 |
| H | 9.96036989265413  | 2.31171839514079  | 12.39756786070237 |
| H | 10.55233769301729 | 0.67620458015664  | 11.98466870151865 |
| C | 7.68325191469587  | 3.28788732155186  | 10.44683788182488 |
| H | 8.74802406411942  | 3.55689059348620  | 10.31956804165370 |
| H | 7.25808298713427  | 3.89580067600159  | 11.26531196106483 |
| C | 3.66039405073643  | 4.44236595752487  | 11.41226951484543 |
| C | 3.93345289467525  | 5.80708413238110  | 11.67492994377239 |
| H | 3.41767693236137  | 6.45401970634960  | 12.38742045376212 |
| C | 5.00979323501507  | 6.16688621911877  | 10.85421586592408 |
| C | 2.64152091283323  | 3.56990985432296  | 12.07077321147270 |
| H | 2.06342569619042  | 2.99704620971035  | 11.32651498597927 |
| H | 3.12525794721916  | 2.82709755563399  | 12.73211626514891 |
| H | 1.95961981768735  | 4.18447958895122  | 12.68097751970728 |
| C | 5.72777036192061  | 7.46580670887774  | 10.69544820371804 |
| H | 6.81597288859624  | 7.34942708775300  | 10.85393081462401 |
| H | 5.58057063669000  | 7.89427765279692  | 9.68661851617130  |
| H | 5.34707480038292  | 8.18938792359458  | 11.43385801024221 |
| C | 6.33443706449466  | 4.85900472243468  | 9.11523391895519  |
| H | 7.09344298822581  | 5.65536533315588  | 9.22513328356911  |
| H | 5.87507708985607  | 4.93938713992614  | 8.11364146721058  |

2 dimer isomer 1 (cut from crystal structure; position of H atoms were optimized)

|    |                  |                  |                   |
|----|------------------|------------------|-------------------|
| Co | 4.46617029848888 | 2.87570177426771 | 9.51448081537163  |
| Cl | 2.54841226842788 | 1.89922569516166 | 10.23907404970594 |
| N  | 4.53252517184542 | 2.52332944370336 | 7.54300373095150  |
| N  | 5.65438587530215 | 2.88010094042453 | 6.84647337209874  |
| N  | 6.41192298125837 | 4.00418993519819 | 8.79537809708076  |
| N  | 5.12894278932998 | 5.69088172229135 | 9.79854044708688  |
| N  | 4.24741352145513 | 4.75061478077363 | 10.25291536204331 |
| N  | 7.21694203887085 | 2.45023541430573 | 10.36895418431974 |
| N  | 5.97587389795932 | 1.88047474534675 | 10.39704878580033 |
| C  | 3.69963886663191 | 1.93980034778717 | 6.64273266312586  |
| C  | 4.32744381544921 | 1.90988330920841 | 5.37569451055819  |
| H  | 3.91190923483319 | 1.51233844124454 | 4.44855652438096  |
| C  | 5.57935942201857 | 2.51439387622088 | 5.53310948247517  |
| C  | 2.34154175803194 | 1.42918671935599 | 6.99517243055363  |
| H  | 2.40086068406634 | 0.61649492696158 | 7.74029196356477  |
| H  | 1.71883704945469 | 2.21809955451518 | 7.44917225544366  |
| H  | 1.84092241298091 | 1.05380856029977 | 6.08819203949759  |
| C  | 6.68788780719448 | 2.73602568996438 | 4.56086232964818  |
| H  | 6.99099644984429 | 3.80063550032386 | 4.54950487061569  |
| H  | 7.57894630124395 | 2.13168996970880 | 4.81696015007209  |
| H  | 6.35735715557943 | 2.44661597530154 | 3.55084600807790  |
| C  | 6.83323130163455 | 3.35250701103577 | 7.56345020174255  |
| H  | 7.47749138791513 | 2.49478575266175 | 7.82847701689711  |
| H  | 7.37926581108827 | 4.03882694433050 | 6.88857382234405  |
| C  | 6.14197716249974 | 0.63395528924690 | 10.90139777828277 |

|    |                   |                   |                   |
|----|-------------------|-------------------|-------------------|
| C  | 7.51000345730769  | 0.43279462437545  | 11.21082323761556 |
| H  | 7.96323894031977  | -0.46760254188315 | 11.63045470090153 |
| C  | 8.17826765538377  | 1.61209644672575  | 10.85733413064563 |
| C  | 5.01602591989297  | -0.34098475615297 | 11.02467663586413 |
| H  | 4.10312337409833  | 0.14905866074710  | 11.40211065773859 |
| H  | 4.75988036357101  | -0.77146415220154 | 10.03783173631511 |
| H  | 5.30311688107288  | -1.16884881931447 | 11.69371597177129 |
| C  | 9.61964234355744  | 1.98918648616282  | 10.95376237642396 |
| H  | 10.02385783930541 | 2.30142282825653  | 9.97293032657898  |
| H  | 9.77733939208943  | 2.82434330972504  | 11.66120410046354 |
| H  | 10.20358668530986 | 1.12454875898707  | 11.30763258745677 |
| C  | 7.33538505412761  | 3.82498824947917  | 9.91192953454918  |
| H  | 8.39203870898381  | 4.01018489073354  | 9.64588977213884  |
| H  | 7.04321963180073  | 4.52248650075475  | 10.71623931116328 |
| C  | 3.63277593489093  | 5.30181058653467  | 11.32993894343127 |
| C  | 4.14513831438769  | 6.60478330718683  | 11.54398568531957 |
| H  | 3.85758372694926  | 7.29908576758275  | 12.33612721420573 |
| C  | 5.11316693193669  | 6.82605048858544  | 10.55575231807509 |
| C  | 2.59877557014258  | 4.59094876214023  | 12.14132706155490 |
| H  | 1.71335722355785  | 4.33819160779130  | 11.53301705484308 |
| H  | 2.98495053624290  | 3.63532884920662  | 12.53671375602083 |
| H  | 2.28553927174025  | 5.22903262365417  | 12.98407346320750 |
| C  | 6.00853324325166  | 7.99167351412632  | 10.30285528435817 |
| H  | 7.0737777042828   | 7.69722652397868  | 10.34538225261604 |
| H  | 5.81047770950580  | 8.41815615591406  | 9.30156005296195  |
| H  | 5.83282507679525  | 8.76707426930072  | 11.06561895215317 |
| C  | 5.91306166531818  | 5.36866894566964  | 8.62710320675440  |
| H  | 6.70621532751397  | 6.12740275915145  | 8.50775029210005  |
| H  | 5.28436735190987  | 5.39872853748067  | 7.72010791205162  |
| Co | 4.81988379115876  | 6.84285545720201  | 5.39567569865321  |
| Cl | 6.99693228013008  | 6.18571886080494  | 5.46808240869266  |
| Cl | 4.35132012489738  | 8.08686805756376  | 7.23290660652131  |
| Cl | 4.52254683562216  | 8.24263981039321  | 3.63588117239435  |
| N  | 3.53679671336519  | 5.34014895079226  | 5.15423716751518  |
| N  | 3.41560191117994  | 4.71049523985574  | 3.94457787319296  |
| N  | 3.81978203638540  | 5.68707229686899  | 1.78759086564508  |
| H  | 4.35819188779155  | 5.52368268058688  | 0.93120686049512  |
| H  | 3.90297169342951  | 6.68717392149803  | 2.03210300117631  |
| C  | 2.46360583127818  | 4.95239437461294  | 5.89338416024473  |
| C  | 1.64282290621374  | 4.10018967252477  | 5.11623224042151  |
| H  | 0.71346395121560  | 3.62169276592498  | 5.42991863699307  |
| C  | 2.27878099319034  | 3.95924321387946  | 3.87875975973744  |
| C  | 2.27903794885345  | 5.33170231949070  | 7.32635651566579  |
| H  | 2.85079002222127  | 4.64742559445652  | 7.98257665967655  |
| H  | 2.63989649329962  | 6.35532477267468  | 7.52666724733189  |
| H  | 1.21653181345879  | 5.24757905805962  | 7.61032144300153  |
| C  | 1.92816224064255  | 3.15215882203384  | 2.67445500523165  |
| H  | 1.90535670600667  | 3.78863712587092  | 1.77143885132496  |
| H  | 2.67822670205483  | 2.35734884454078  | 2.49746852402274  |
| H  | 0.94524178404007  | 2.67331477738325  | 2.81097919450452  |
| C  | 4.39332486432352  | 4.91994861915361  | 2.87252773017878  |
| H  | 5.26964483946038  | 5.38481043651916  | 3.37244159696308  |
| H  | 4.70143026498309  | 3.92492882296921  | 2.50636435939447  |

2 dimer isomer 2 (cut from crystal structure; position of H atoms were optimized)

|    |                    |                   |                  |
|----|--------------------|-------------------|------------------|
| Co | 9.84296131182642   | 11.07889209433022 | 2.97204153985834 |
| Cl | 11.81565444770722  | 12.13679131632745 | 2.55963481255943 |
| N  | 9.72208276412201   | 10.96615827114078 | 4.98015948792977 |
| N  | 8.50066572015480   | 10.68330737304716 | 5.52356179779054 |
| N  | 7.78177983406011   | 10.02277386760718 | 3.38789693707607 |
| N  | 9.09116247072253   | 8.32679067010002  | 2.41564405892481 |
| N  | 10.011177239937780 | 9.27966801224487  | 2.08277943979706 |
| N  | 7.21746355283193   | 11.80812014037873 | 1.96950801713598 |
| N  | 8.47340123423019   | 12.30965120062679 | 2.16049162041367 |
| C  | 10.59968024552835  | 10.98476991466184 | 6.01370578723906 |
| C  | 9.90595133557121   | 10.72840848529644 | 7.22183172140724 |
| H  | 10.33258575095262  | 10.67635266114964 | 8.22561483304783 |
| C  | 8.56061919663590   | 10.53543451112768 | 6.87850331736282 |
| C  | 12.06644199547703  | 11.19749858719699 | 5.82094696089912 |
| H  | 12.25889242826756  | 12.03203697140591 | 5.12616639770162 |
| H  | 12.54033865638185  | 10.30181954706067 | 5.37631282627662 |

|    |                   |                   |                   |
|----|-------------------|-------------------|-------------------|
| H  | 12.55059903686109 | 11.39580742038935 | 6.79129732346310  |
| C  | 7.35992002179631  | 10.23603177355897 | 7.71300707206646  |
| H  | 6.81644216952115  | 9.35374235570123  | 7.32310736414543  |
| H  | 6.65125838446219  | 11.08528526862822 | 7.72379865356140  |
| H  | 7.66966340170998  | 10.03259904367579 | 8.75063645662085  |
| C  | 7.34335139643555  | 10.61782008621808 | 4.64739146430626  |
| H  | 6.96131510312983  | 11.63113371717689 | 4.43140323731473  |
| H  | 6.54860350164647  | 10.03616569803820 | 5.14851804837478  |
| C  | 8.40564407041823  | 13.62702084316828 | 1.84557667982933  |
| C  | 7.08670481679012  | 13.94295220879362 | 1.43702720906849  |
| H  | 6.71330506902903  | 14.92029935238107 | 1.12457219123514  |
| C  | 6.34296331593162  | 12.75793254263134 | 1.52868146735828  |
| C  | 9.57690013007199  | 14.54861162933967 | 1.96013298546619  |
| H  | 10.38757029390959 | 14.25537217936975 | 1.27053665474911  |
| H  | 10.00912213198348 | 14.51946871205112 | 2.97571329600861  |
| H  | 9.26418017474909  | 15.58074678065602 | 1.73184587072689  |
| C  | 4.91028146557308  | 12.46479154173810 | 1.22859403083703  |
| H  | 4.42061031275346  | 11.93754613297100 | 2.07023276361147  |
| H  | 4.80838049066829  | 11.82194595803741 | 0.33388043477269  |
| H  | 4.37075914075635  | 13.40627111059002 | 1.03730447017346  |
| C  | 6.98275310968935  | 10.39836141475224 | 2.22380423513515  |
| H  | 5.89930193712937  | 10.24272373303630 | 2.37238848492106  |
| H  | 7.31605639641726  | 9.78413658046272  | 1.36932789821573  |
| C  | 10.78922933937171 | 8.73022288076124  | 1.11652011131765  |
| C  | 10.35542344606464 | 7.40582094750851  | 0.86295086788460  |
| H  | 10.77956420104078 | 6.70359237523008  | 0.14229077069975  |
| C  | 9.26330129053393  | 7.17191722630409  | 1.71028777724178  |
| C  | 11.88555908812683 | 9.48447185810226  | 0.43630292058043  |
| H  | 12.51075743534530 | 10.02494348231540 | 1.16682017727737  |
| H  | 11.47299457530524 | 10.24711567353903 | -0.25100029619545 |
| H  | 12.51010840824644 | 8.79284152671647  | -0.15266993968825 |
| C  | 8.40648599562718  | 5.96542121172084  | 1.90923792003479  |
| H  | 7.33219439152928  | 6.21537030791178  | 1.81550530072674  |
| H  | 8.55636790684208  | 5.52279937478913  | 2.91198084503266  |
| H  | 8.65936360038556  | 5.20227079894864  | 1.15588811741633  |
| C  | 8.13163505428857  | 8.60830393468116  | 3.46863797951741  |
| H  | 7.26451702294353  | 7.93778679010855  | 3.33771711615176  |
| H  | 8.57411366112907  | 8.41953999276168  | 4.46226260654592  |
| Co | 4.40531227724013  | 8.03055772663871  | 3.94923159589470  |
| Cl | 5.82254484324852  | 7.49391806464163  | 5.64693968449350  |
| Cl | 3.93589700626260  | 10.23746509531222 | 4.14544319023194  |
| Cl | 5.12279309963603  | 7.66200086144170  | 1.80830795452961  |
| N  | 2.86864275632769  | 6.78726679556038  | 4.10483339554691  |
| N  | 2.99995683953591  | 5.43398462392734  | 3.95908870141873  |
| N  | 4.38933097073613  | 4.48259542658526  | 2.24465554247550  |
| H  | 5.11518219807491  | 3.77238018331100  | 2.10853626705262  |
| H  | 4.66677267425739  | 5.32475905576757  | 1.71912526182134  |
| C  | 1.54669069174465  | 7.03073431703561  | 4.27984954244768  |
| C  | 0.83372812048618  | 5.80807604903818  | 4.22648083093695  |
| H  | -0.24446432349017 | 5.67004023390725  | 4.33233774707139  |
| C  | 1.78863329529287  | 4.80585231001181  | 4.01421123928049  |
| C  | 1.01509830963614  | 8.40930504417711  | 4.51216834267252  |
| H  | 1.25332199186868  | 8.76402295947057  | 5.53252876380219  |
| H  | 1.46224811283774  | 9.13611497455720  | 3.81262774023669  |
| H  | -0.08139399472251 | 8.41694093973979  | 4.39568601959948  |
| C  | 1.65361569161649  | 3.32859149650050  | 3.84838939961917  |
| H  | 2.13351529051498  | 3.00130370079009  | 2.90798790005723  |
| H  | 2.14091954390946  | 2.77975928126146  | 4.67665742894508  |
| H  | 0.58897336136843  | 3.04564764345940  | 3.82807281448507  |
| C  | 4.29819024929883  | 4.82421922703258  | 3.64952724569370  |
| H  | 5.05125511231057  | 5.54941002860024  | 4.02109429136705  |
| H  | 4.38644124994673  | 3.90929487276443  | 4.25979397839478  |
